# Supplementary material for: The use of genome wide association methods to investigate pathogenicity, population structure and serovar in Haemophilus parasuis
Source: PubMed Central journal article supplement (PMC4532294; doi:10.1186/1471-2164-15-1179), 2014-12-24

1

2

3

4

5

6

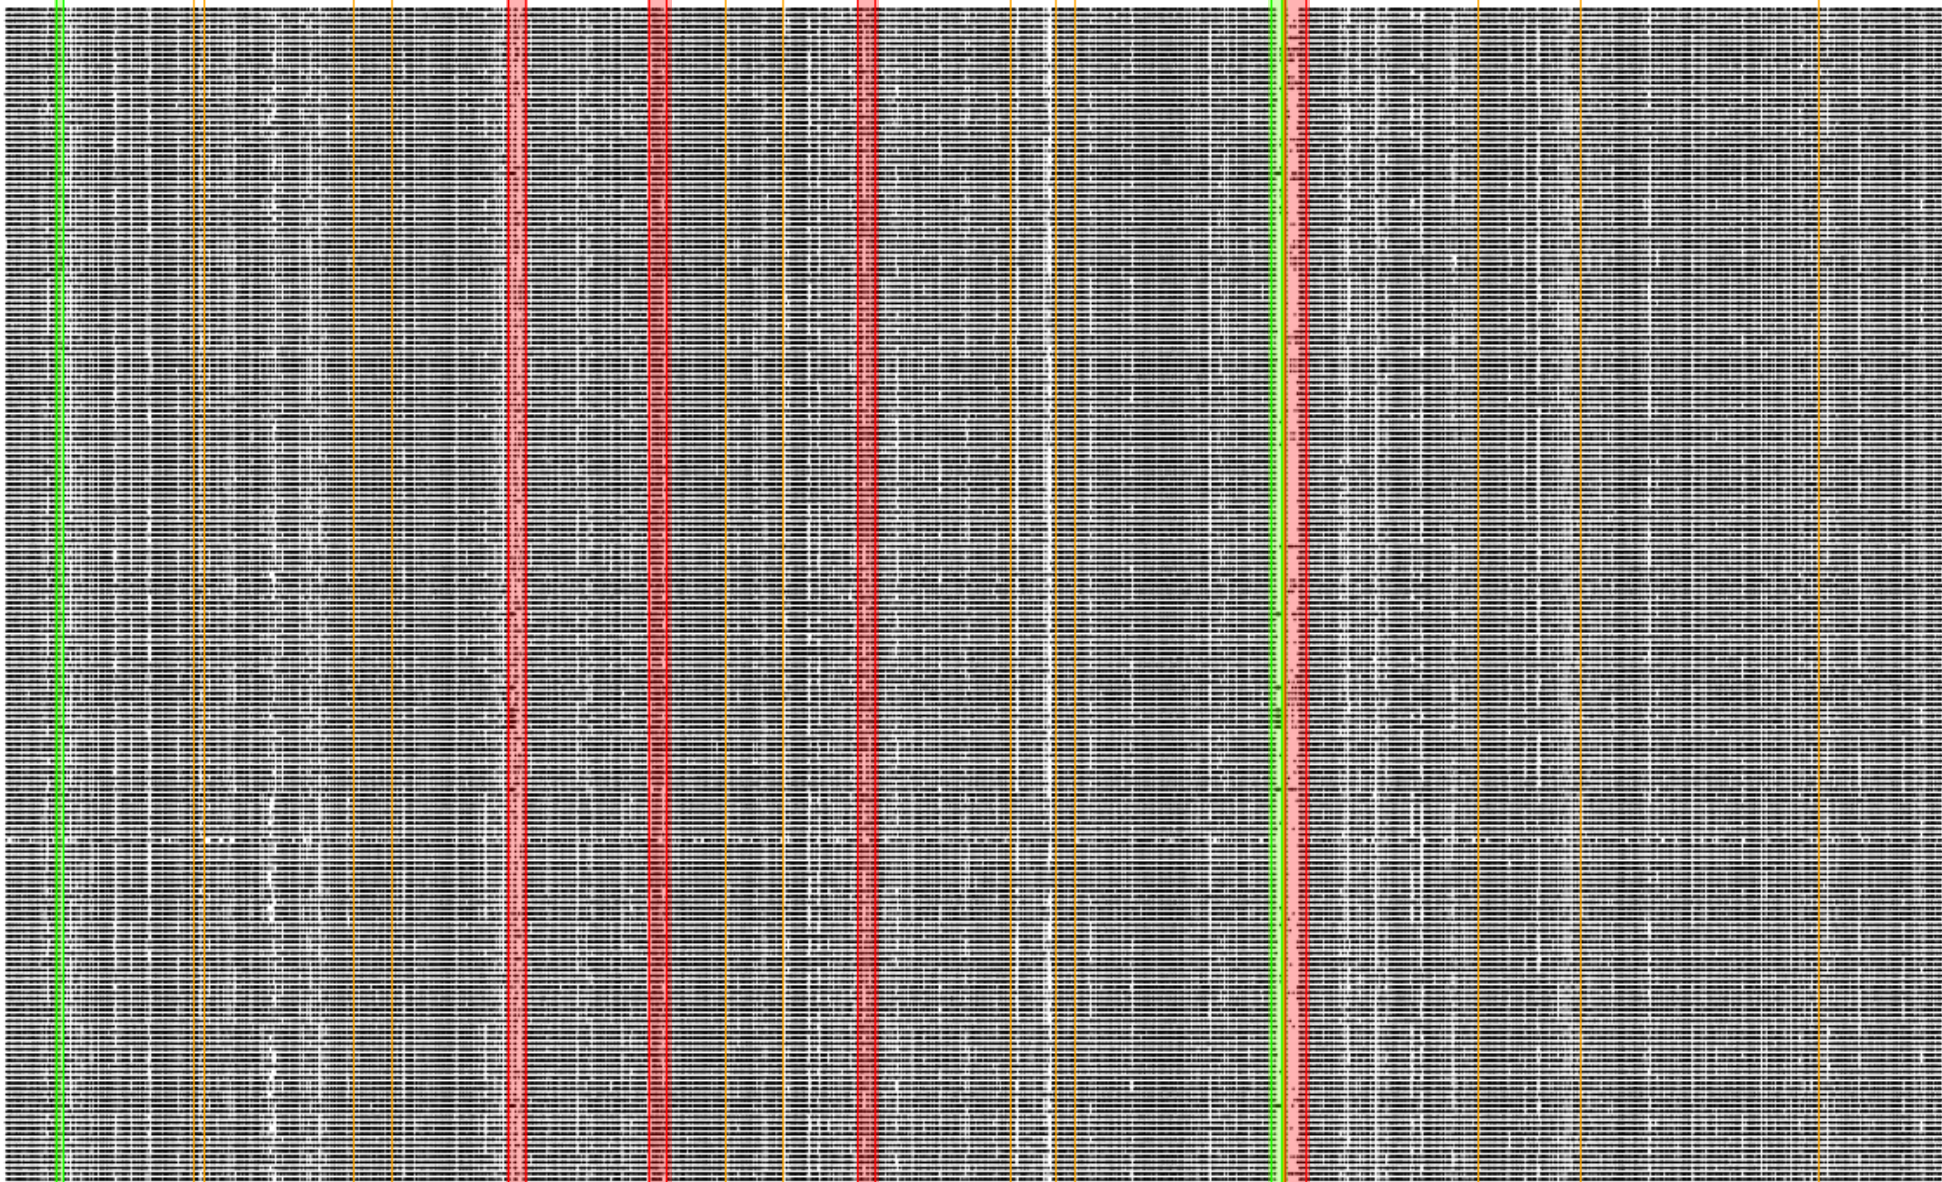

Supplement: 12864_2014_7083_MOESM4_ESM.pdf [file 12864_2014_7083_MOESM4_ESM.pdf]
